# Supplementary material for: Carbohydrate Restriction-Induced Elevations in LDL-Cholesterol and Atherosclerosis: The KETO Trial
Source: PubMed Central journal article supplement — JACC Adv. 2024 Aug 28;3(8):101109. doi: 10.1016/j.jacadv.2024.101109 (PMC11450898; doi:10.1016/j.jacadv.2024.101109), 2024-08-28
Supplement: mmc1.pdf [file mmc1.pdf]

**Table S1.** Multivariable linear regression of CCTA semi-quantitative measures among KETO and Miami Heart (MiHeart) subjects.

| <b>Multivariable Analysis *</b> |             |        |       |
|---------------------------------|-------------|--------|-------|
|                                 | Exp $\beta$ | StdErr | p     |
| CAC score                       | 1.00        | 0.38   | 0.998 |
| Total Stenosis Score            | 0.96        | 0.13   | 0.766 |
| Total Plaque Score              | 0.92        | 0.13   | 0.524 |
| Segment Involvement Score       | 0.94        | 0.12   | 0.588 |

\*adjusted for Age and BMI. Exp $\beta$  is the exponentiated Beta coefficient, StdErr is the standard error. CCTA measures log transformed to address assumptions of linear regression.

**Table S2.** CCTA semi-quantitative measures compared between 35 KETO subjects matched 1:1 to 35 Miami Heart (MiHeart) subjects who met the 3 stricter LMHR criteria (LDL-C  $\geq$  200 mg/dl, HDL-C  $\geq$  80 mg/dl, triglycerides  $\leq$  70 mg/dl), Coronary Artery Calcium (CAC); Coronary CT Angiography (CCTA). Group comparisons performed by Wilcoxon Rank Sum Test, and median and interquartile range (IQR) are reported.

|                           | <b>KETO</b> | <b>MiHeart</b> | <b>P</b> |
|---------------------------|-------------|----------------|----------|
|                           | N = 35      | N = 35         |          |
| <b>CAC score</b>          | 0 (0 - 47)  | 0 (0 - 23)     | 0.849    |
| <b>CCTA scores</b>        |             |                |          |
| Total Stenosis Score      | 0 (0 - 2)   | 0 (0 - 3)      | 0.530    |
| Total Plaque Score        | 0 (0 - 2)   | 0 (0 - 3)      | 0.430    |
| Segment Involvement Score | 0 (0 - 2)   | 0 (0 - 3)      | 0.448    |
